# Supplementary material for: Cognate HLA absence in trans diminishes human NK cell education
Source: JCI journal article supplement (doi:10.1172/jci86923), 2016-08-28
Supplement: sd1 [file 1]

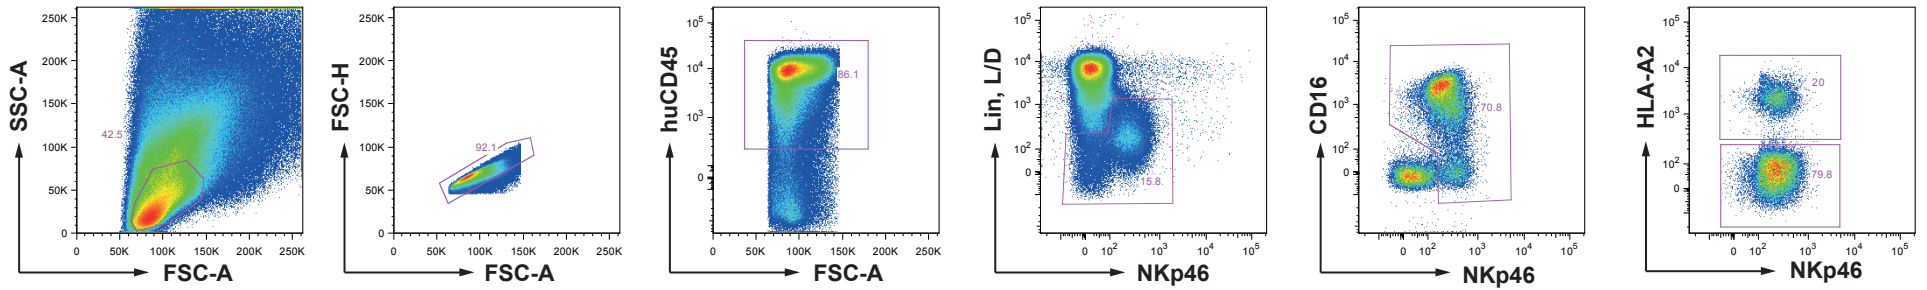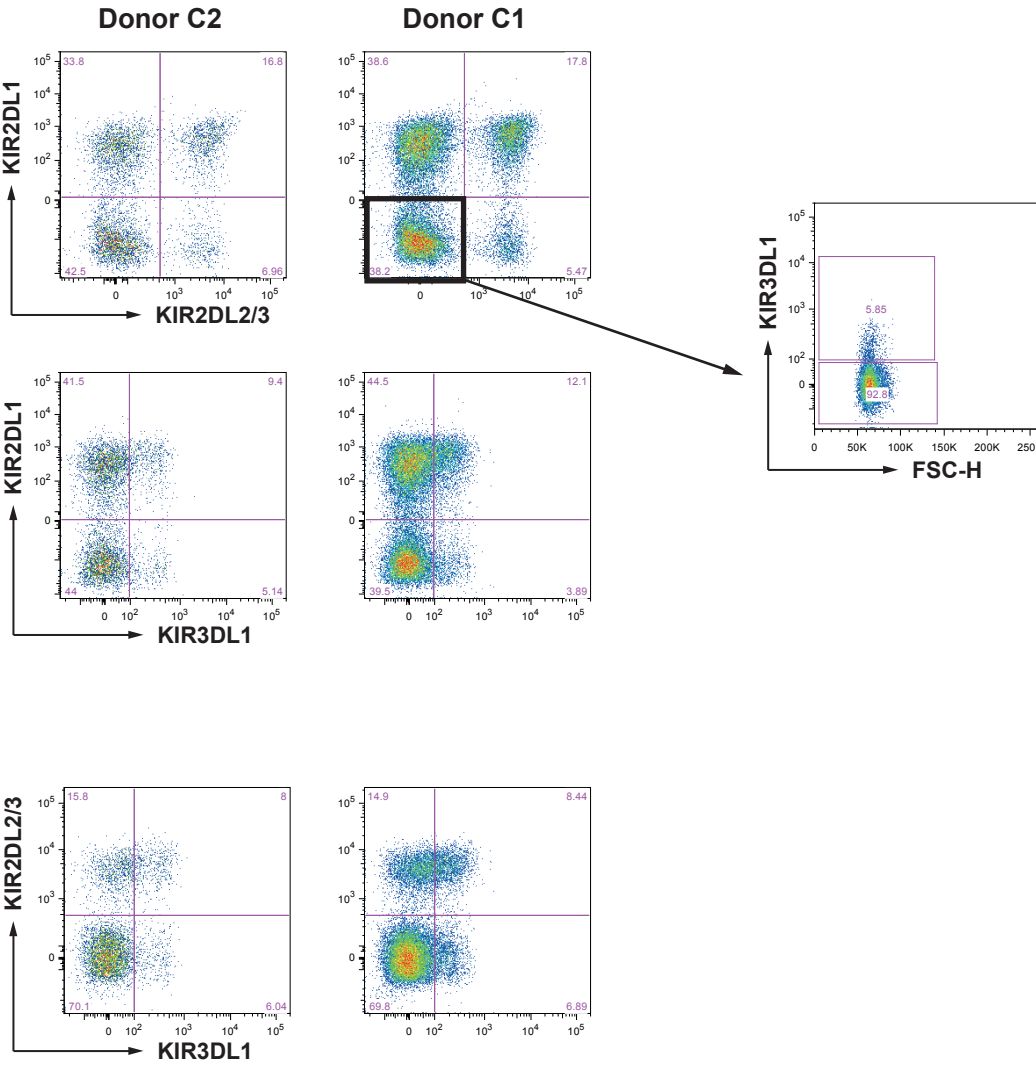

**Figure S1, related to Figure 2. Gating strategy of KIR subsets.**

Spleen and livers of huNSG were processed and stained with fluorescent markers for flow cytometry. Cells were pre-gated on lymphocytes and singlets before discriminating for the huCD45<sup>+</sup> population. HuCD45<sup>+</sup> lymphocytes were gated on Lin<sup>-</sup>, L/D<sup>-</sup> vs. NKp46. NKp46<sup>+</sup> cells were further characterized by CD16 to arrive at the NK cell population. NK cells were assessed according to HLA-A2 for their donor origin and then gated on KIR expression. To arrive at single positive KIR populations, double negative quadrants were gated on the third parameter as shown in a representative plot. Gatings for KIR subsets were replicated in all the necessary combinations.

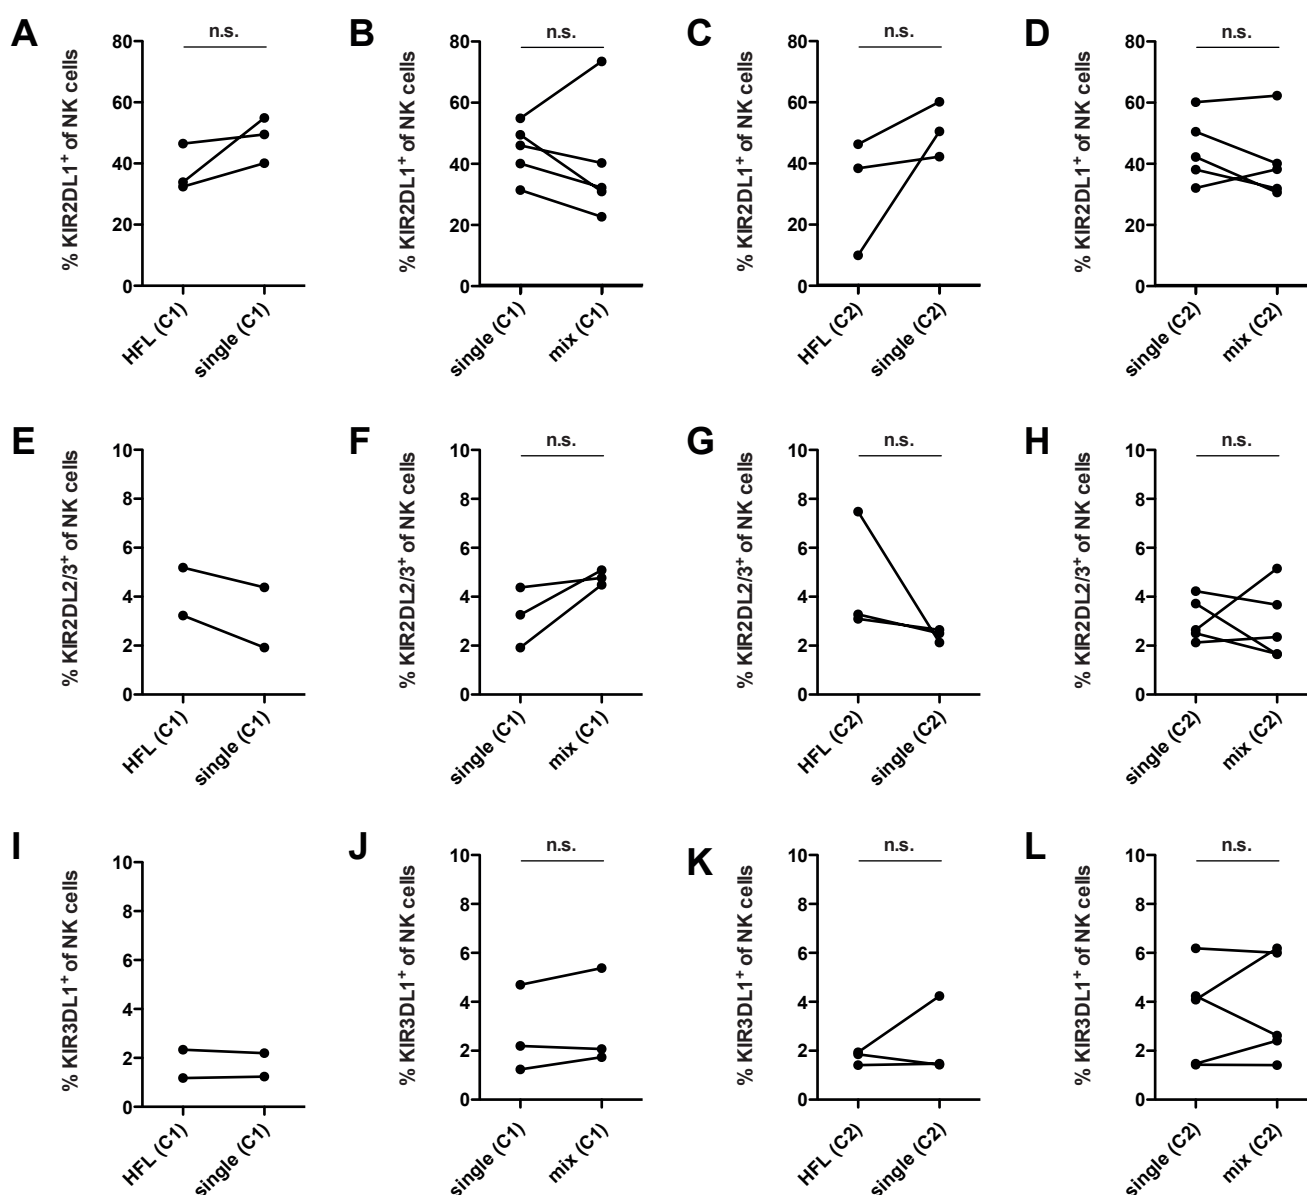

**Figure S2, related to Figure 2. KIR frequencies at steady state represent original donor values and do not change in presence of non-cognate HLA in trans.**

HuNSG mice were single reconstituted with donors homozygous for HLA-C and -B allotypes (HLA-C1, -C2 and -Bw4) or reconstituted with two donors disparate for allotype and HLA-A2 expression (mix).

(A to L) Mean percentage per experiment of single KIR<sup>+</sup> liver NK cells as derived from total NK cells of huNSG mice.

(A to D) KIR2DL1<sup>+</sup> NK cells of HLA-C1 single reconstituted huNSG mice as compared to HLA-C1 donor HFL NK cells (A) or HLA-C1 donor derived cells from mixed reconstituted huNSG mice (B) and conversely for HLA-C2 single reconstituted huNSG mice to HLA-C2 donor HFL (C) or HLA-C2 donor derived cells from mixed reconstituted huNSG mice (D).

(E to H) KIR2DL2/3<sup>+</sup> NK cells of HLA-C1 single reconstituted huNSG mice as compared to HLA-C1 donor HFL NK cells (E) or HLA-C1 donor derived cells from mixed reconstituted huNSG mice (F) and conversely for HLA-C2 single reconstituted huNSG mice to HLA-C2 donor HFL (G) or HLA-C2 donor derived cells from mixed reconstituted huNSG mice (H).

(I to L) KIR3DL1<sup>+</sup> NK cells of HLA-C1 single reconstituted huNSG mice as compared to HLA-C1 donor HFL NK cells (I) or HLA-C1 donor derived cells from mixed reconstituted huNSG mice (J) and conversely for HLA-C2 single reconstituted huNSG mice to HLA-C2 donor HFL (K) or HLA-C2 donor derived cells from mixed reconstituted huNSG mice (L).

Data are pooled data from at least three independent experiments. Dots represent mean of population in separate experiments, paired t test, n.s., not significant.

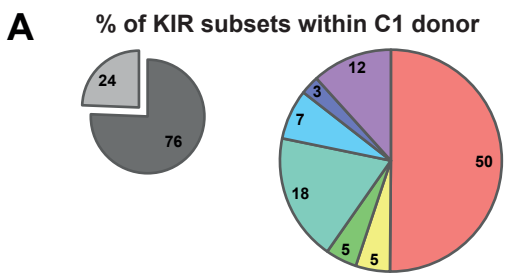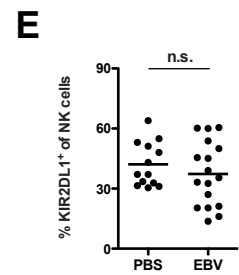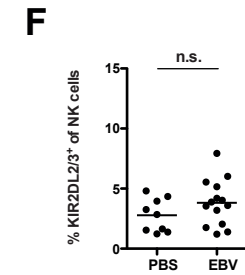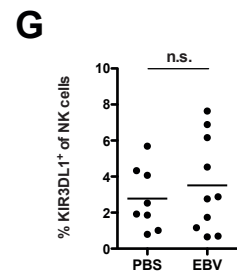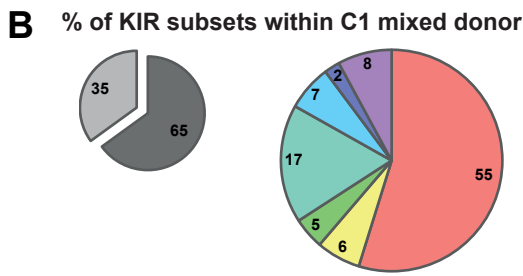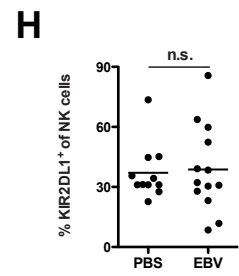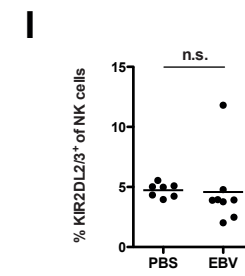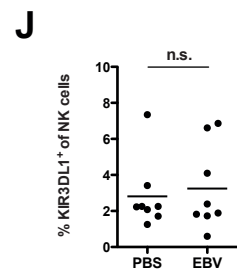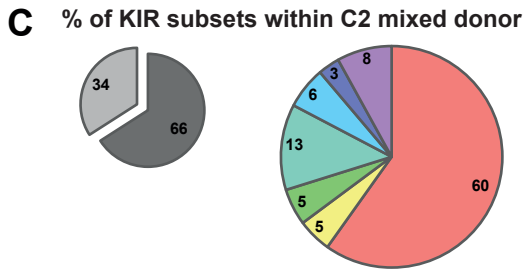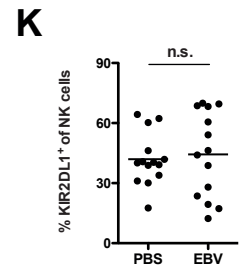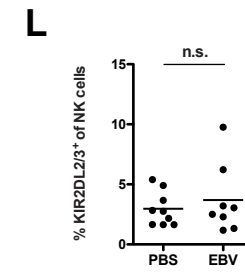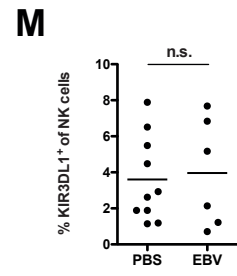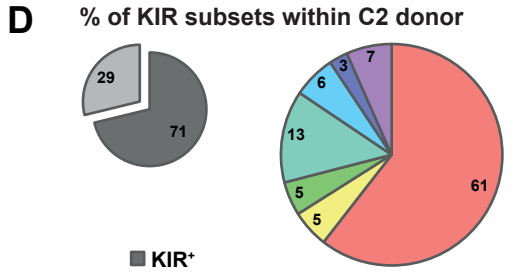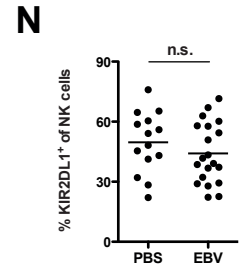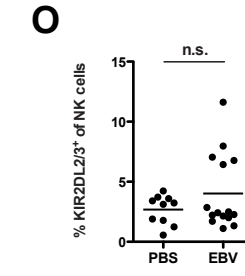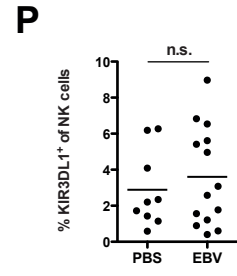

**Figure S3, related to Figure 3. Infection with EBV does not lead to skewing of KIR repertoire.**

HuNSG mice were single reconstituted with donors homozygous for HLA-C and -B allotypes (HLA-C1, -C2 and -Bw4) or reconstituted with two donors disparate for allotype and HLA-A2 expression (mix). Grey pie charts depict the ratio of KIR<sup>+</sup> to KIR<sup>-</sup> NK cells and colored pie charts represent the indicated KIR<sup>+</sup> NK cell subsets.

(A to D) Subsets of KIR expressing NK cells as percentages of total KIR<sup>+</sup> NK cells in liver of EBV infected huNSG mice.

(E to P) Frequency of single KIR<sup>+</sup> NK cells in liver of huNSG at endpoint. Comparison of PBS controls to EBV infected animals for frequency of KIR2DL1<sup>+</sup>, KIR2DL2/3<sup>+</sup> or KIR3DL1<sup>+</sup> NK cells in homozygously reconstituted huNSG mice with HLA-C1 donor (E to G), mixed donor reconstituted huNSG mice with cells derived from HLA-C1 donor (H to J) or HLA-C2 donor (K to M) and homozygously reconstituted huNSG mice with HLA-C2 donor (M to P).

Data are pooled data from at least three independent experiments. n=8-15 mice per group, bar represents mean in relevant graphs, unpaired t test, n.s., not significant.

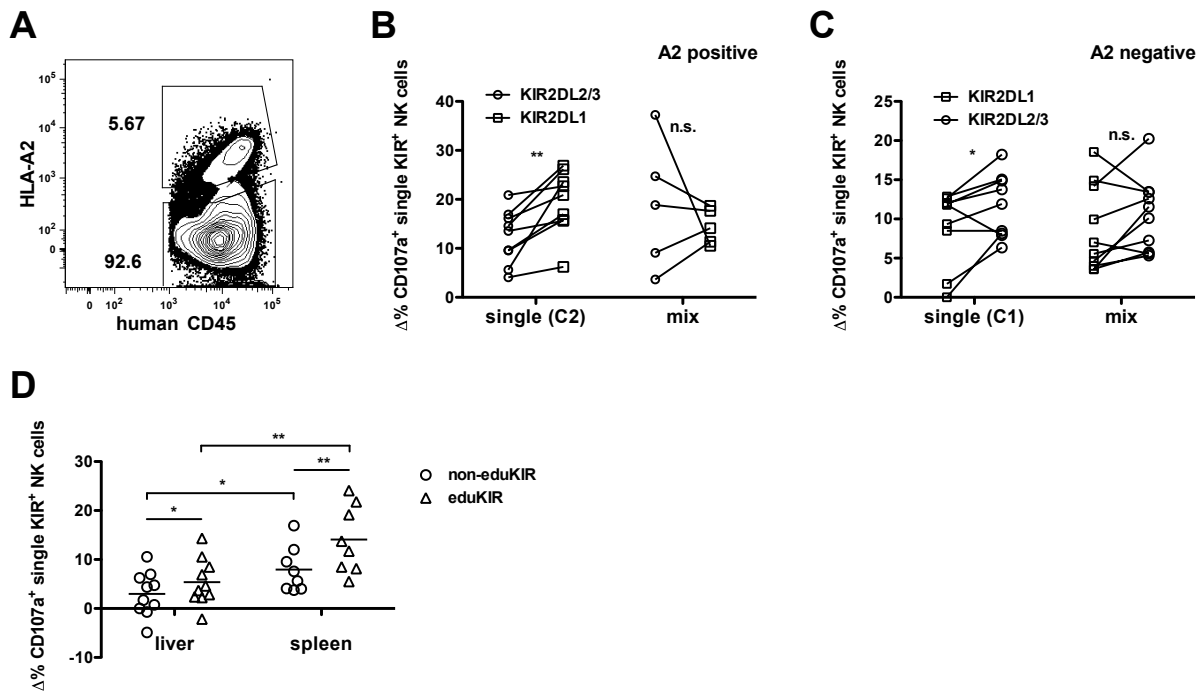

**Figure S4, related to Figure 4. No titrating effect of non-cognate MHC class I on human NK cell education and decreased degranulation with lower education in liver NK cells.**

HuNSG mice were single reconstituted with donors homozygous for HLA-C and -B allotype (HLA-C1 or C2) or reconstituted with both the same HLA-C1 and C2 donor disparate for HLA-A2.

(A) Representative dot plot showing overall human leukocyte reconstitution derived from HLA-C1 donor (A2 negative) and C2 donor (A2 positive) in double reconstituted huNSG mice (mix) with unequal reconstitution discovered by chance in subsets of mice. Average  $\pm$  s.e.m. of C2 donor reconstitution (% frequency of HLA-A2<sup>+</sup> in human CD45<sup>+</sup> leukocytes) in these mice was  $4.07 \pm 1.27$  (n=10).

(B and C) Degranulation of single KIR<sup>+</sup> NK cells after incubation of K562 cells with splenocytes from huNSG mice reconstituted with HLA-C1 homozygous and/or HLA-C2 homozygous donors from the same experiment as shown in (A). Single KIR<sup>+</sup> NK cells were gated in both single and mixed reconstituted huNSG mice on cells derived from (B) HLA-C2 A2 positive donor or from (C) HLA-C1 A2 negative donor (n=5-10 mice per group).  $\Delta\%$ CD107a refers to the difference of degranulation with and without K562 re-stimulation. Average  $\pm$  s.e.m. of spontaneous degranulation was  $1.94 \% \pm 0.50$ .

(D) Comparison of degranulation of single KIR<sup>±</sup> non-educated (non-eduKIR) versus educated (eduKIR) NK cells derived from liver or spleen of single donor reconstituted huNSG mice after co-culture with K562 cells (n=8-10 mice per group).  $\Delta\%$ CD107a refers to the difference of degranulation with and without K562 re-stimulation. Average  $\pm$  s.e.m. of spontaneous degranulation was  $2.30 \% \pm 0.68$ .

Data in (A) to (C) are pooled data from two independent experiments, data in (D) show data from one representative experiment. Data were analyzed by multiple t tests, \*p < 0.05, p\*\* < 0.01.

**Figure S5, related to Figure 6. No change in T cell response of different reconstitutions.**

HuNSG mice were single reconstituted with donors homozygous for HLA-C and -B allotypes (HLA-C1, -C2 and -Bw4) or reconstituted with two donors disparate for allotype and HLA-A2 expression (mix).

(A to I) Frequencies in percent of T cell subsets in spleens of huNSG mice at experimental endpoints.

(A to D) CD8<sup>+</sup> T cell subsets in PBS control huNSG mice single reconstituted with homozygous HLA-C1 donor (A), HLA-C2 donor (D) or mixed donor reconstituted huNSG mice with T cells derived from HLA-C1 donor (B) and derived from HLA-C2 donor (C).

(E to H) CD8<sup>+</sup> T cell subsets in EBV infected huNSG mice single reconstituted with homozygous HLA-C1 donor (E), HLA-C2 donor (H) or mixed donor reconstituted huNSG mice with T cells derived from HLA-C1 donor (F) and derived from HLA-C2 donor (G).

(I) Comparison of frequencies of effector memory CD8<sup>+</sup> T cells in EBV infected single and mixed reconstituted huNSG mice at experimental endpoints in spleen.

Data are pooled data from at least two independent experiments. n=5-8 mice per group, mean ± SEM, unpaired t test, n.s., not significant.

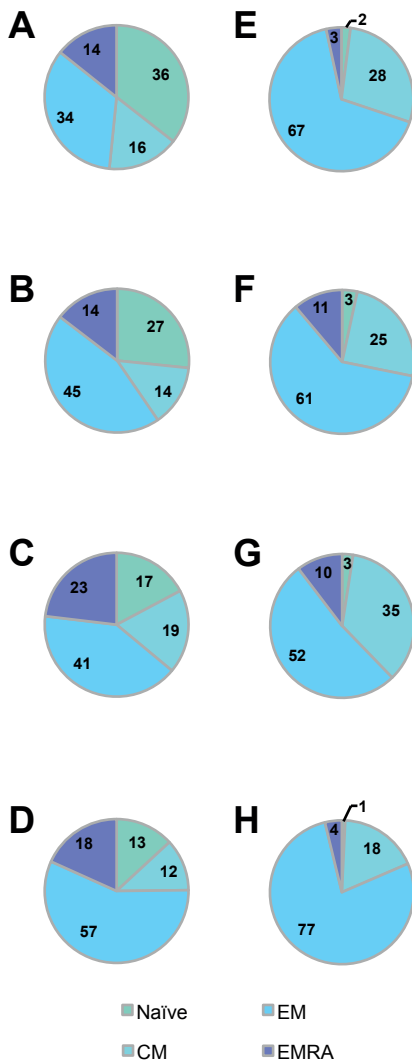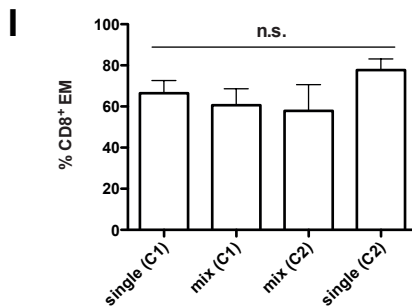

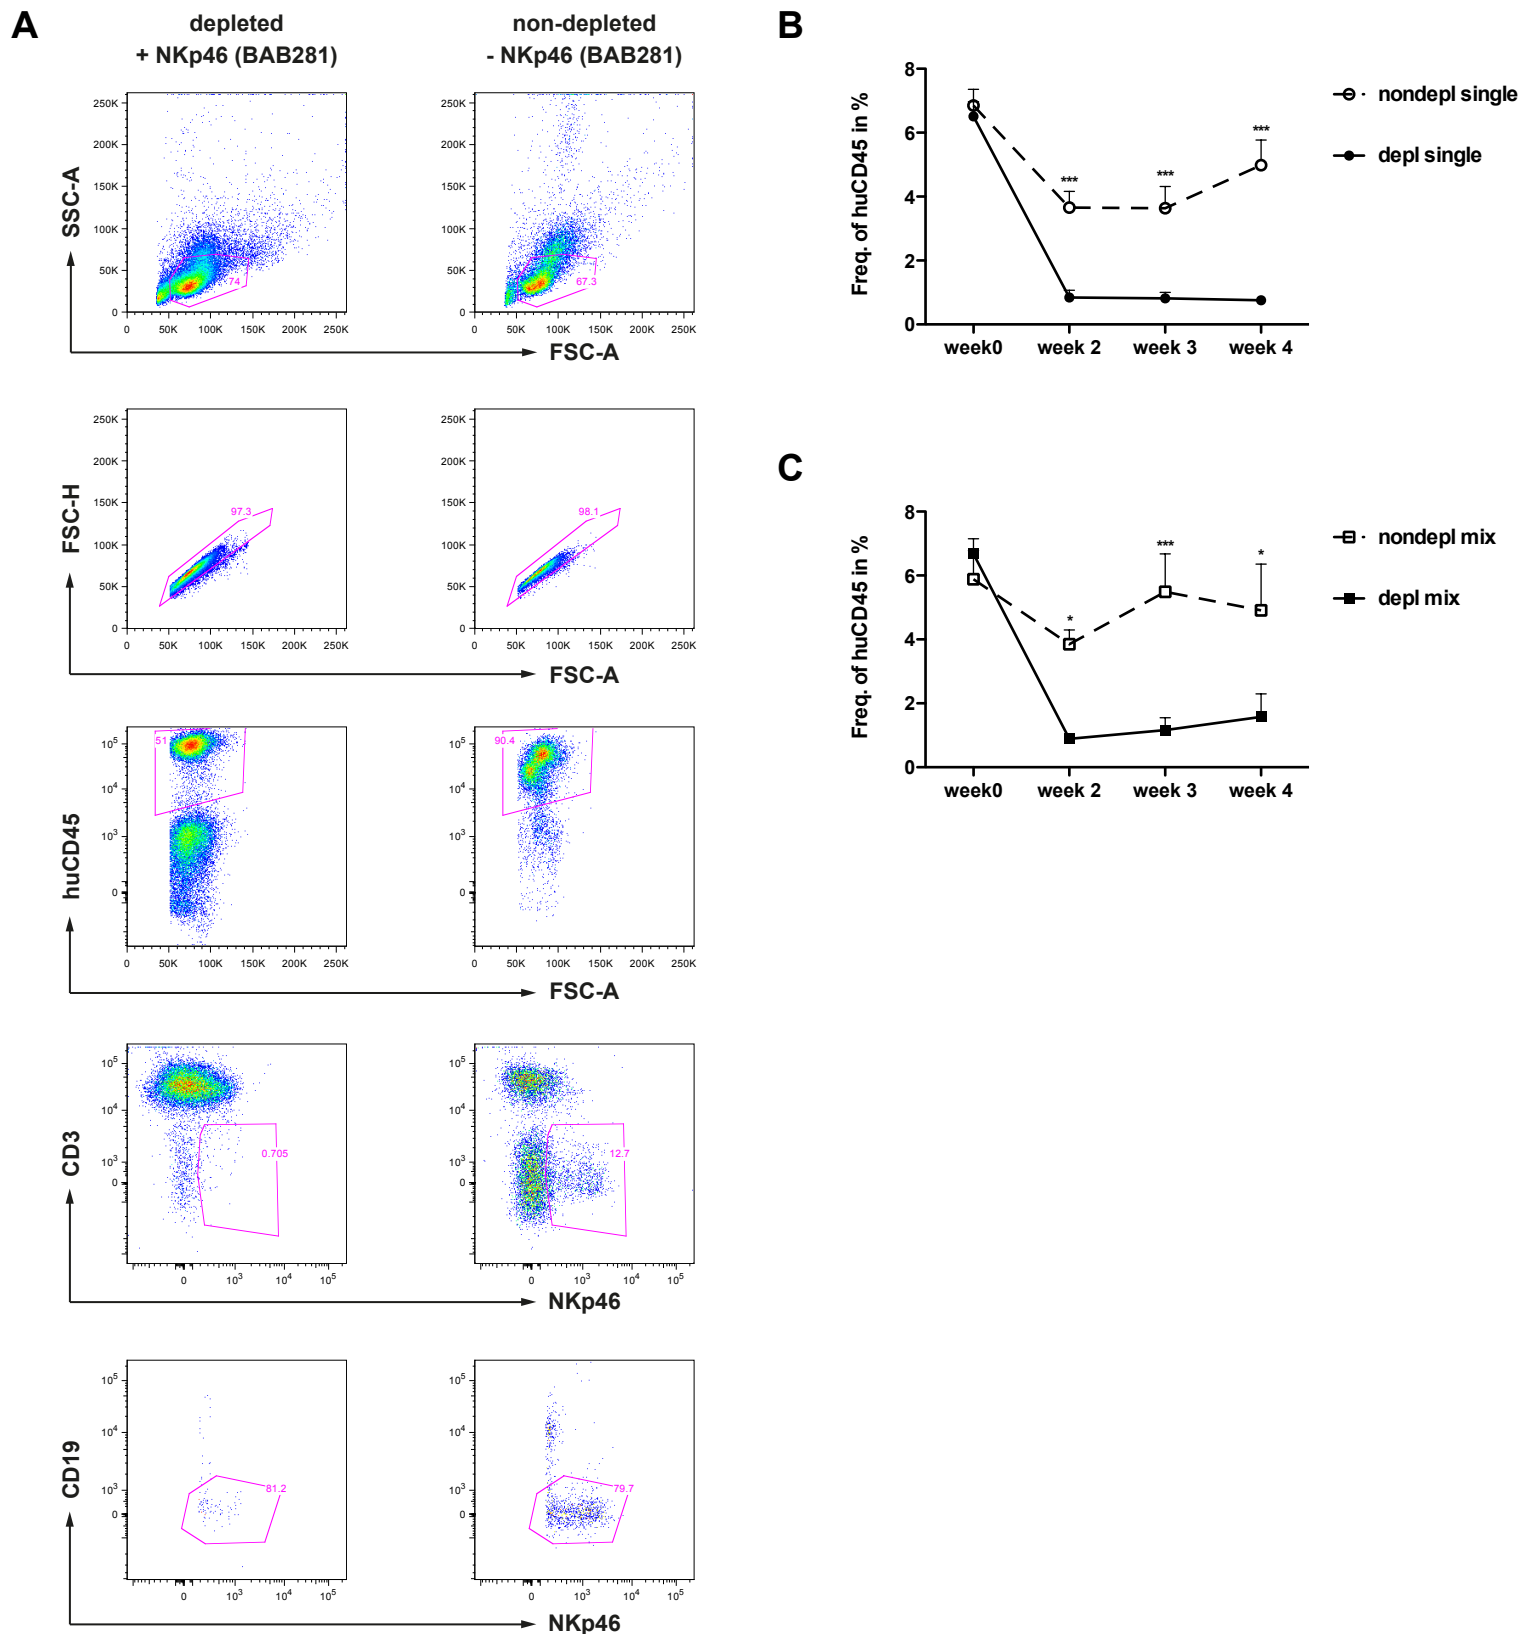

**Figure S6, related to Figure 7. NKp46 mediated depletion of NK cells persists throughout the duration of the experiment.**

NK cells in huNSG mice were depleted by i.p. injection of NKp46 binding antibody (clone BAB281) on 3 consecutive days prior to infection with EBV. Depletion of NK cells over the course of the experiment was assessed by flow cytometry. (A) Cells were pre-gated on lymphocytes and singlets before discriminating for the huCD45<sup>±</sup> population. NK cells were defined as huCD45<sup>±</sup> CD3<sup>-</sup> NKp46<sup>±</sup> CD19<sup>-</sup> events. In both single (B) and mixed reconstituted huNSG mice (C) NK cell frequencies of depleted animals remained low throughout the duration of the experiment.

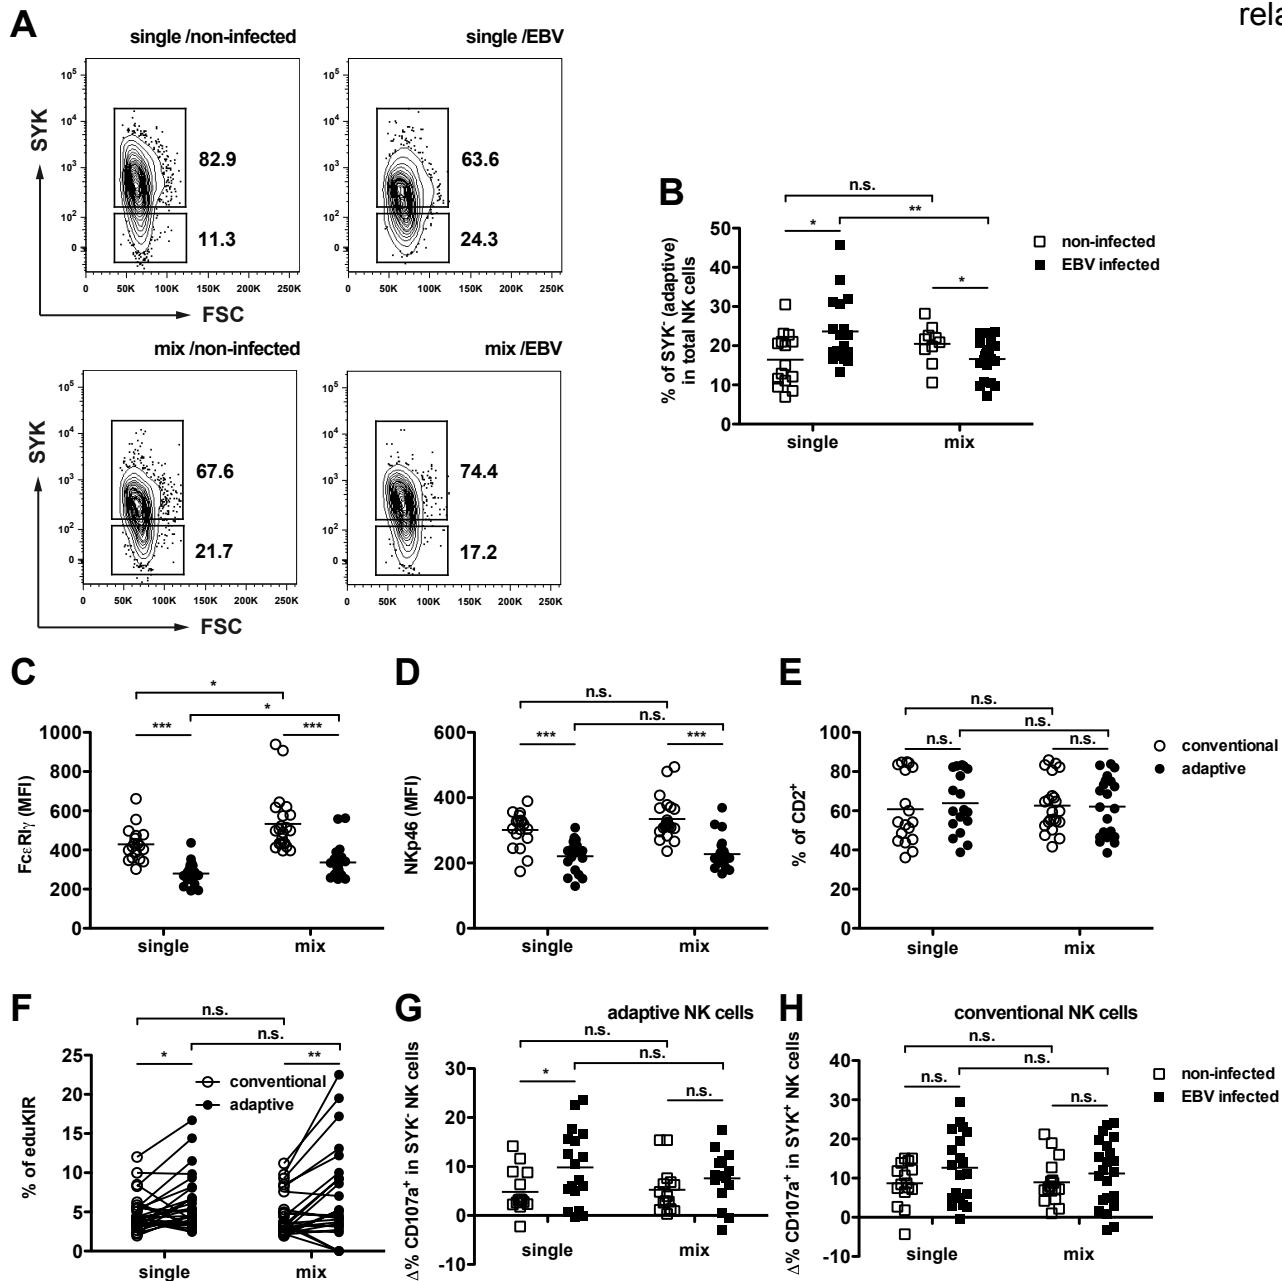

**Figure S7, related to Figure 7. No expansion of NK cells with an adaptive phenotype in mixed reconstituted huNSG mice.**

(A) Representative dot plots showing expression of SYK in splenic NK cells from single and mixed reconstituted huNSG mice infected or not with EBV.

(B) Frequency of SYK<sup>-</sup> (adaptive) splenic NK cells in single and mixed reconstituted huNSG mice 5 weeks after EBV infection compared to non-infected controls (n=10-21 mice per group).

(C to F) SYK<sup>+</sup> (conventional) and SYK<sup>-</sup> (adaptive) splenic NK cells in single and mixed reconstituted huNSG mice 5 weeks after EBV infection compared for expression (median fluorescence intensity, MFI) of FcεR1γ (C), NKp46 (D), frequency of CD2 expression (E) and frequency of educated (eduKIR) NK cells (F). n=18-28 mice per group.

(G and H) Degranulation of splenic NK cells with adaptive (SYK<sup>-</sup>) phenotype (G) and conventional (SYK<sup>+</sup>) phenotype (H) in single and mixed reconstituted huNSG mice 5 weeks after EBV infection compared to non-infected controls after CD16 stimulation. Δ%CD107a<sup>+</sup> refers to the difference of degranulation with and without CD16 stimulation. Average ± s.e.m. of spontaneous degranulation was 5.85 % ± 0.66. (n=15-22 mice per group).

Data are pooled data from at least two independent experiments. Bar represents mean. Data were analyzed by multiple t tests, \*p < 0.05, p\*\* < 0.01, p\*\*\* < 0.001.

## Supplemental Experimental Procedures

**Table S1. Overview of fluorescently labeled antibodies**

| <b>Molecule</b>   | <b>Clone</b> | <b>Fluorophore</b> | <b>Company</b>  |
|-------------------|--------------|--------------------|-----------------|
| <b>CD107a</b>     | H4A3         | FITC               | BD Biosciences  |
| <b>NKp46</b>      | 9E2          | APC                | BD Biosciences  |
| <b>KIR2DL1/S1</b> | EB6B         | PE Cy7             | Beckman&Coulter |
| <b>KIR2DL2/L3</b> | GL183        | PE Cy5.5           | Beckman&Coulter |
| <b>NKG2A</b>      | Z199         | PE                 | Beckman&Coulter |
| <b>CD14</b>       | M5E2         | BV510              | BioLegend       |
| <b>CD16</b>       | 3G8          | APC Cy7            | BioLegend       |
| <b>CD19</b>       | HIB19        | BV510              | BioLegend       |
| <b>CD2</b>        | RPA-2.10     | FITC               | BioLegend       |
| <b>CD3</b>        | OKT3         | BV510              | BioLegend       |
| <b>CD3</b>        | OKT3         | BV785              | BioLegend       |
| <b>CD4</b>        | RPA-T4       | APC Cy7            | BioLegend       |
| <b>CD4</b>        | RPA-T4       | BV510              | BioLegend       |
| <b>CD45</b>       | HI30         | BV605              | BioLegend       |
| <b>CD45RA</b>     | HI100        | BV510              | BioLegend       |
| <b>CD57</b>       | HCD57        | Pacific Blue       | BioLegend       |
| <b>CD8</b>        | SK1          | PerCP              | BioLegend       |
| <b>HLA-A2</b>     | BB7.2        | APC Cy7            | BioLegend       |
| <b>HLA-A2</b>     | BB7.2        | FITC               | BioLegend       |
| <b>HLA-A2</b>     | BB7.2        | Pacific Blue       | BioLegend       |
| <b>HLA-A2</b>     | BB7.2        | PE                 | BioLegend       |
| <b>HLA-DR</b>     | L243         | PE Cy7             | BioLegend       |
| <b>KIR2DL1/S1</b> | HP-MA4       | FITC               | BioLegend       |
| <b>KIR2DL2/L3</b> | DX27         | PE                 | BioLegend       |
| <b>KIR2DL2/L3</b> | DX27         | PE Cy7             | BioLegend       |
| <b>KIR3DL1</b>    | DX9          | Alexa Fluor 700    | BioLegend       |
| <b>KIR3DL1</b>    | DX9          | PE Cy7             | BioLegend       |
| <b>Syk</b>        | 4D10.2       | PE                 | BioLegend       |
| <b>CD19</b>       | SJ25-C1      | PE Texas Red       | invitrogen      |
| <b>FcεR1γ</b>     | Polyclonal   | FITC               | Merck Millipore |
| <b>CCR7</b>       | 150503       | PE                 | R&D Systems     |
